# Supplementary material
Source: ML conference proceedings conference paper supplement (https://proceedings.neurips.cc/paper_files/paper/2019/hash/23c894276a2c5a16470e6a31f4618d73-Abstract.html)
Supplement: Supplementary file 1 [file 23c894276a2c5a16470e6a31f4618d73-Supplemental.pdf]

## Appendix for “Diffusion Improves Graph Learning”

### A Graph diffusion as a polynomial filter

We want to find a direct correspondence between graph diffusion with  $\theta_k$  and a polynomial filter with parameters  $\xi_j$ , i.e.

$$\sum_{j=0}^J \xi_j \mathbf{L}^j \stackrel{!}{=} \sum_{k=0}^K \theta_k \mathbf{T}^k. \quad (8)$$

To do so, we first expand  $\mathbf{T} = \mathbf{I}_N - \mathbf{L}$  and use the binomial equation, i.e.

$$\begin{aligned} \sum_{k=0}^K \theta_k \mathbf{T}^k &= \sum_{k=0}^K \theta_k (\mathbf{I}_N - \mathbf{L})^k = \\ &= \sum_{k=0}^K \theta_k \sum_{j=0}^k \binom{k}{j} (-1)^j \mathbf{I}_N^{k-j} \mathbf{L}^j = \\ &= \sum_{k=0}^K \sum_{j=0}^k \binom{k}{j} \theta_k (-1)^j \mathbf{L}^j = \\ &= \sum_{\substack{j,k \in [0,K] \\ j \leq k}} \binom{k}{j} \theta_k (-1)^j \mathbf{L}^j = \\ &= \underbrace{\sum_{j=0}^K \sum_{k=j}^K \binom{k}{j} \theta_k (-1)^j}_{\xi_j} \mathbf{L}^j, \end{aligned} \quad (9)$$

where we recognize the coefficients  $\xi_j$  and see that we need to set  $J = K$ . Note that we reordered the summation indices by recognizing the triangular sum, i.e. the sum over index pairs  $(j, k)$  with  $j \leq k$ . The equation for conversion in the opposite direction is obtained in the same way since  $\mathbf{L} = \mathbf{I}_N - \mathbf{T}$ . To obtain a more convenient form for  $K \rightarrow \infty$  we shift the summation index using  $m = k - j$ , i.e.

$$\xi_j = \sum_{k=j}^K \binom{k}{j} (-1)^j \theta_k = \sum_{m=0}^{K-j} \binom{m+j}{j} (-1)^j \theta_{m+j}. \quad (10)$$

To find corresponding coefficients for the heat kernel, we let  $K \rightarrow \infty$ , set  $\theta_k = e^{-t} \frac{t^k}{k!}$ , and use the exponential series to obtain

$$\begin{aligned} \xi_j^{\text{HK}} &= \sum_{m=0}^{\infty} \binom{m+j}{j} (-1)^j e^{-t} \frac{t^{m+j}}{(m+j)!} = \\ &= \sum_{m=0}^{\infty} \frac{(m+j)!}{m!j!} (-1)^j e^{-t} \frac{t^{m+j}}{(m+j)!} = \\ &= e^{-t} \frac{(-t)^j}{j!} \sum_{m=0}^{\infty} \frac{t^m}{m!} = \frac{(-t)^j}{j!} e^{-t} e^t = \frac{(-t)^j}{j!}. \end{aligned} \quad (11)$$

To obtain the coefficients for PPR, we let  $K \rightarrow \infty$ , set  $\theta_k = \alpha(1-\alpha)^k$ , and recognize the series expansion  $\frac{1}{(1-x)^{j+1}} = \sum_{m=0}^{\infty} \binom{m+j}{m} x^m$ , resulting in

$$\begin{aligned} \xi_j^{\text{PPR}} &= \sum_{m=0}^{\infty} \binom{m+j}{j} (-1)^j \alpha(1-\alpha)^{m+j} = \\ &= \alpha(-1)^j (1-\alpha)^j \sum_{m=0}^{\infty} \binom{m+j}{m} (1-\alpha)^m = \\ &= \alpha(\alpha-1)^j \frac{1}{\alpha^{j+1}} = \left(1 - \frac{1}{\alpha}\right)^j. \end{aligned} \quad (12)$$

## B Experiments

For optimizing the hyperparameters for node classification the data is split into a development and a test set. The development set contains 1500 nodes for all datasets but for COAUTHOR CS, where it contains 5000 nodes. All remaining nodes are part of the test set and only used once for testing. The development set is split into a training set containing 20 nodes per class and a validation set with the remaining nodes. For every run the accuracy is determined using 100 different random splits of the development set using fixed seeds. Different seeds are used for validation and test splits. Early stopping patience is set to 100 epochs with a maximum limit of 10000 epochs, which is never reached. The patience is reset after an increase in accuracy on the validation set. For the test runs we select the hyperparameter configurations that showed the highest average accuracy on the validation splits.

We use the same development set for optimizing the hyperparameters for clustering. The test set is only once for generating test results. Clustering results are averaged over 20 randomly initialized runs.

Confidence intervals are calculated by bootstrapping the accuracy results from 100 or 20 runs, respectively, with 1000 samples. All implementations for node classification as well as DGI are based on PyTorch [58] and PyTorch Geometric [21]. The remaining experiments are based on NumPy [72], SciPy [30], graph-tool [60], and gensim [20]. For  $k$ -means clustering we use the implementation by scikit-learn [59]. All datasets are included in PyTorch Geometric, available at [https://github.com/rusty1s/pytorch\\_geometric](https://github.com/rusty1s/pytorch_geometric). Experiments using PyTorch are run on Nvidia GPUs using CUDA and the remaining experiments are run on Intel CPUs.

For all experiments the largest connected component of the graph is selected. Dropout probability is set to  $p = 0.5$  for all experiments and performed after every application of the activation function. PPR preprocessing is done with  $\alpha \in [0.05, 0.30]$ , heat kernel preprocessing with  $t \in [1, 10]$ . For top- $k$  matrix sparsification  $k$  is set to either 64 or 128 and for  $\epsilon$ -thresholding  $\epsilon$  is chosen from  $[0.00001, 0.01]$ . We do not choose  $\epsilon$  directly but rather calculate which  $\epsilon$  corresponds to a chosen average degree. For node classification we use the Adam optimizer with a learning rate of 0.01. The hidden dimension of GNNs is kept fixed at 64 with the exception of ARMA, where the dimensionality of a single stack is chosen from 16 or 32. For ARMA, up to three stacks and two layers are tested. GCN and GAT are run with up to 4 layers, JK and GIN with up to six layers.  $L_2$ -regularization is performed on the parameters of the first layer of every model with  $\lambda_{L_1} \in [0.001, 10]$ . Unsupervised models use a node embedding dimension of 128. DGI uses the Adam optimizer with a learning rate of 0.001. For a full list of final hyperparameters per model, diffusion, and dataset see Sec. B.3.

### B.1 Datasets

Table 1: Dataset statistics.

| Dataset     | Type        | Classes | Features | Nodes  | Edges   | Label rate |
|-------------|-------------|---------|----------|--------|---------|------------|
| CORA        | Citation    | 7       | 1433     | 2485   | 5069    | 0.056      |
| CITSEER     | Citation    | 6       | 3703     | 2120   | 3679    | 0.057      |
| PUBMED      | Citation    | 3       | 500      | 19 717 | 44 324  | 0.003      |
| COAUTHOR CS | Co-author   | 15      | 6805     | 18 333 | 81 894  | 0.016      |
| AMZ COMP    | Co-purchase | 10      | 767      | 13 381 | 245 778 | 0.015      |
| AMZ PHOTOS  | Co-purchase | 8       | 745      | 7487   | 119 043 | 0.021      |

### B.2 Results

To support our claim of achieving state-of-the-art node classification performance we also include results (and hyperparameters) of APPNP, which has been shown to be the current state of the art for semi-supervised node classification and uses graph diffusion internally [21, 23].

Table 2: Average accuracy (%) on CORA with bootstrap-estimated 95% confidence levels.

| Model    | No diffusion        | Heat         | PPR                 | AdaDIF       |
|----------|---------------------|--------------|---------------------|--------------|
| GCN      | 81.71 ± 0.26        | 83.48 ± 0.22 | 83.58 ± 0.23        | 82.93 ± 0.23 |
| GAT      | 80.10 ± 0.34        | 81.54 ± 0.25 | 81.60 ± 0.25        | 81.32 ± 0.22 |
| JK       | 82.14 ± 0.24        | 83.69 ± 0.29 | 83.78 ± 0.22        | 83.43 ± 0.21 |
| GIN      | 73.96 ± 0.46        | 76.54 ± 0.63 | 78.74 ± 0.44        | 75.94 ± 0.45 |
| ARMA     | 81.62 ± 0.24        | 83.32 ± 0.22 | 83.81 ± 0.21        | 83.24 ± 0.22 |
| APPNP    | <b>83.83 ± 0.23</b> | -            | -                   | -            |
| DCSBM    | 59.75 ± 1.59        | 64.63 ± 2.60 | 68.52 ± 1.47        | -            |
| Spectral | 29.29 ± 1.03        | 35.16 ± 2.96 | 34.03 ± 2.01        | -            |
| DeepWalk | 68.67 ± 1.01        | 68.76 ± 0.67 | 69.42 ± 0.07        | -            |
| DGI      | 54.29 ± 1.21        | 67.71 ± 1.69 | <b>69.61 ± 1.73</b> | -            |

Table 3: Average accuracy (%) on CITESEER with bootstrap-estimated 95% confidence levels.

| Model    | No diffusion | Heat         | PPR                 | AdaDIF       |
|----------|--------------|--------------|---------------------|--------------|
| GCN      | 72.02 ± 0.31 | 73.22 ± 0.27 | <b>73.35 ± 0.27</b> | 71.58 ± 0.31 |
| GAT      | 69.52 ± 0.32 | 70.25 ± 0.34 | 68.50 ± 0.21        | 68.68 ± 0.22 |
| JK       | 70.34 ± 0.38 | 72.38 ± 0.27 | 72.24 ± 0.31        | 71.11 ± 0.33 |
| GIN      | 61.09 ± 0.58 | 62.82 ± 0.50 | 64.07 ± 0.48        | 61.46 ± 0.51 |
| ARMA     | 70.84 ± 0.32 | 71.90 ± 0.33 | 72.28 ± 0.29        | 71.45 ± 0.31 |
| APPNP    | 72.76 ± 0.25 | -            | -                   | -            |
| DCSBM    | 46.70 ± 2.18 | 56.81 ± 1.21 | 57.14 ± 1.40        | -            |
| Spectral | 27.02 ± 0.57 | 29.61 ± 1.29 | 29.26 ± 1.46        | -            |
| DeepWalk | 55.33 ± 1.05 | 66.05 ± 0.56 | 65.81 ± 0.16        | -            |
| DGI      | 54.62 ± 2.28 | 71.58 ± 0.94 | <b>72.42 ± 0.39</b> | -            |

Table 4: Average accuracy (%) on PUBMED with bootstrap-estimated 95% confidence levels.

| Model    | No diffusion | Heat                | PPR          | AdaDIF       |
|----------|--------------|---------------------|--------------|--------------|
| GCN      | 78.23 ± 0.40 | 79.62 ± 0.36        | 78.72 ± 0.37 | 77.46 ± 0.36 |
| GAT      | 76.32 ± 0.47 | 77.78 ± 0.34        | 76.66 ± 0.32 | 75.98 ± 0.33 |
| JK       | 78.47 ± 0.36 | <b>79.95 ± 0.28</b> | 79.22 ± 0.32 | 78.01 ± 0.41 |
| GIN      | 72.38 ± 0.63 | 74.16 ± 0.62        | 73.62 ± 0.63 | 68.14 ± 0.80 |
| ARMA     | 77.14 ± 0.36 | 79.64 ± 0.35        | 78.85 ± 0.36 | 77.32 ± 0.37 |
| APPNP    | 79.78 ± 0.33 | -                   | -            | -            |
| DCSBM    | 46.64 ± 1.85 | 67.38 ± 1.45        | 64.51 ± 1.75 | -            |
| Spectral | 37.97 ± 0.02 | 49.28 ± 3.08        | 48.05 ± 2.69 | -            |
| DeepWalk | 70.77 ± 0.14 | <b>71.36 ± 0.14</b> | 69.96 ± 0.12 | -            |
| DGI      | 49.96 ± 2.21 | 65.94 ± 0.23        | 66.52 ± 0.35 | -            |

Table 5: Average accuracy (%) on COAUTHOR CS with bootstrap-estimated 95% confidence levels.

| Model    | No diffusion | Heat         | PPR                 | AdaDIF       |
|----------|--------------|--------------|---------------------|--------------|
| GCN      | 91.83 ± 0.08 | 92.79 ± 0.07 | <b>93.01 ± 0.07</b> | 92.28 ± 0.06 |
| GAT      | 90.89 ± 0.13 | 89.82 ± 0.10 | 91.33 ± 0.07        | 88.29 ± 0.06 |
| JK       | 91.11 ± 0.09 | 92.40 ± 0.08 | 92.41 ± 0.07        | 91.68 ± 0.08 |
| ARMA     | 91.32 ± 0.08 | 92.32 ± 0.09 | 92.63 ± 0.08        | 91.03 ± 0.09 |
| APPNP    | 92.08 ± 0.07 | -            | -                   | -            |
| DCSBM    | 57.70 ± 1.52 | 63.70 ± 0.93 | 61.71 ± 1.15        | -            |
| Spectral | 24.74 ± 2.28 | 50.47 ± 3.20 | 55.27 ± 3.00        | -            |
| DeepWalk | 61.26 ± 0.91 | 63.77 ± 1.28 | <b>65.29 ± 1.40</b> | -            |
| DGI      | 57.52 ± 2.63 | 62.84 ± 1.84 | 63.79 ± 1.89        | -            |

Table 6: Average accuracy (%) on AMZ COMP with bootstrap-estimated 95% confidence levels.

| Model    | No diffusion | Heat                | PPR                 | AdaDIF       |
|----------|--------------|---------------------|---------------------|--------------|
| GCN      | 84.75 ± 0.23 | <b>86.77 ± 0.21</b> | 86.04 ± 0.24        | 85.73 ± 0.23 |
| GAT      | 45.37 ± 4.20 | 86.68 ± 0.26        | 85.37 ± 0.33        | 86.55 ± 0.26 |
| JK       | 83.33 ± 0.27 | 86.51 ± 0.26        | 85.66 ± 0.30        | 84.40 ± 0.32 |
| GIN      | 55.44 ± 0.83 | 81.11 ± 0.62        | 75.08 ± 1.20        | 56.52 ± 1.65 |
| ARMA     | 84.36 ± 0.26 | 86.09 ± 0.27        | 84.92 ± 0.26        | 84.92 ± 0.29 |
| APPNP    | 81.72 ± 0.25 | -                   | -                   | -            |
| DCSBM    | 44.61 ± 0.77 | 55.80 ± 1.29        | <b>57.92 ± 2.25</b> | -            |
| Spectral | 40.39 ± 1.11 | 50.89 ± 3.05        | 52.62 ± 2.14        | -            |
| DeepWalk | 55.61 ± 0.25 | 56.29 ± 0.50        | 55.05 ± 0.98        | -            |
| DGI      | 30.84 ± 1.96 | 37.27 ± 1.21        | 36.81 ± 1.12        | -            |

Table 7: Average accuracy (%) on AMZ PHOTO with bootstrap-estimated 95% confidence levels.

| Model    | No diffusion | Heat                | PPR          | AdaDIF       |
|----------|--------------|---------------------|--------------|--------------|
| GCN      | 92.08 ± 0.20 | 92.82 ± 0.23        | 92.20 ± 0.22 | 92.37 ± 0.22 |
| GAT      | 53.40 ± 5.49 | 91.86 ± 0.20        | 90.89 ± 0.27 | 91.65 ± 0.20 |
| JK       | 91.07 ± 0.26 | <b>92.93 ± 0.21</b> | 92.37 ± 0.22 | 92.34 ± 0.22 |
| GIN      | 68.34 ± 1.16 | 87.24 ± 0.65        | 83.41 ± 0.82 | 75.37 ± 0.86 |
| ARMA     | 91.41 ± 0.22 | 92.05 ± 0.24        | 91.09 ± 0.24 | 90.38 ± 0.28 |
| APPNP    | 91.42 ± 0.26 | -                   | -            | -            |
| DCSBM    | 66.30 ± 1.70 | 67.13 ± 2.49        | 64.28 ± 1.81 | -            |
| Spectral | 28.15 ± 0.81 | 49.86 ± 2.06        | 53.65 ± 3.22 | -            |
| DeepWalk | 78.82 ± 0.85 | <b>79.26 ± 0.09</b> | 78.73 ± 0.10 | -            |
| DGI      | 40.09 ± 2.14 | 49.02 ± 1.78        | 51.34 ± 1.96 | -            |

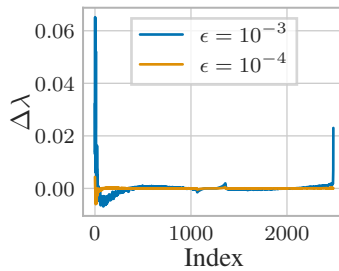

Figure 11: Close-up of difference caused by sparsification (Fig. 2b). Primarily the lowest and highest eigenvalues of the Laplacian are affected.

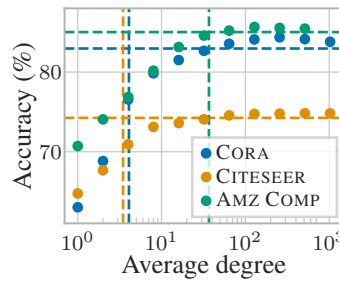

Figure 12: GCN+GDC accuracy (using PPR and sparsification by threshold  $\epsilon$ ). Lines indicate original accuracy and degree. GDC surpasses the original accuracy at around the same degree independent of dataset. Sparsification can improve accuracy.

### B.3 Hyperparameters

Table 8: Hyperparameters for GCN obtained by grid and random search.

| Diffusion | Dataset name | $\alpha$ | $t$ | $k$ | $\epsilon$ | $\lambda_{L_2}$ | Learning rate | Dropout | Hidden dimension | Hidden depth |
|-----------|--------------|----------|-----|-----|------------|-----------------|---------------|---------|------------------|--------------|
| -         | CORA         |          |     |     |            | 0.06            |               |         |                  |              |
|           | CITeseer     |          |     |     |            | 10.0            |               |         |                  |              |
|           | PUBMED       |          |     |     |            | 0.03            | 0.01          | 0.5     | 64               | 1            |
|           | COAUTHOR CS  | -        | -   | -   | -          | 0.06            |               |         |                  |              |
|           | AMZ COMP     |          |     |     |            | 0.03            |               |         |                  |              |
|           | AMZ PHOTO    |          |     |     |            | 0.03            |               |         |                  |              |
| Heat      | CORA         |          | 5   | -   | 0.0001     | 0.09            |               |         |                  | 1            |
|           | CITeseer     |          | 4   | -   | 0.0009     | 10.0            |               |         |                  | 1            |
|           | PUBMED       |          | 3   | -   | 0.0001     | 0.04            | 0.01          | 0.5     | 64               | 1            |
|           | COAUTHOR CS  | -        | 1   | 64  | -          | 0.08            |               |         |                  | 1            |
|           | AMZ COMP     |          | 5   | -   | 0.0010     | 0.07            |               |         |                  | 1            |
|           | AMZ PHOTO    |          | 3   | -   | 0.0001     | 0.08            |               |         |                  | 2            |
| PPR       | CORA         | 0.05     |     | 128 |            | 0.10            |               |         |                  |              |
|           | CITeseer     | 0.10     |     |     | 0.0009     | 10.0            |               |         |                  |              |
|           | PUBMED       | 0.10     | -   | 64  | -          | 0.06            | 0.01          | 0.5     | 64               | 1            |
|           | COAUTHOR CS  | 0.10     |     | 64  |            | 0.03            |               |         |                  |              |
|           | AMZ COMP     | 0.10     |     | 64  |            | 0.04            |               |         |                  |              |
|           | AMZ PHOTO    | 0.15     |     | 64  |            | 0.03            |               |         |                  |              |
| AdaDIF    | CORA         |          |     | 128 |            | 0.08            |               |         |                  | 1            |
|           | CITeseer     |          |     | 128 |            | 0.08            |               |         |                  | 1            |
|           | PUBMED       |          |     | 128 | -          | 0.01            | 0.01          | 0.5     | 64               | 2            |
|           | COAUTHOR CS  | -        | -   | 64  | -          | 0.03            |               |         |                  | 1            |
|           | AMZ COMP     |          |     | 64  |            | 0.02            |               |         |                  | 1            |
|           | AMZ PHOTO    |          |     | 64  |            | 0.02            |               |         |                  | 1            |

Table 9: Hyperparameters for GAT obtained by grid and random search.

| Diffusion | Dataset name | $\alpha$ | $t$ | $k$ | $\epsilon$ | $\lambda_{L_2}$ | Learning rate | Dropout | Hidden dimension | Hidden depth |
|-----------|--------------|----------|-----|-----|------------|-----------------|---------------|---------|------------------|--------------|
| -         | CORA         |          |     |     |            | 0.06            |               |         |                  | 1            |
|           | CITSEER      |          |     |     |            | 0.06            |               |         |                  | 1            |
|           | PUBMED       |          |     |     |            | 0.03            | 0.01          | 0.5     | 64               | 2            |
|           | COAUTHOR CS  | -        | -   | -   | -          | 0.00            |               |         |                  | 2            |
|           | AMZ COMP     |          |     |     |            | 0.09            |               |         |                  | 1            |
|           | AMZ PHOTO    |          |     |     |            | 0.08            |               |         |                  | 1            |
| Heat      | CORA         |          |     |     | 0.0010     | 0.04            |               |         |                  | 1            |
|           | CITSEER      |          |     |     | 0.0010     | 0.08            |               |         |                  | 1            |
|           | PUBMED       |          |     |     | 0.0005     | 0.02            | 0.01          | 0.5     | 64               | 2            |
|           | COAUTHOR CS  | -        | 1   | -   | 0.0005     | 0.03            |               |         |                  | 1            |
|           | AMZ COMP     |          |     |     | 0.0005     | 0.01            |               |         |                  | 1            |
|           | AMZ PHOTO    |          |     |     | 0.0005     | 0.01            |               |         |                  | 1            |
| PPR       | CORA         |          |     |     | 0.0050     | 0.08            |               |         |                  | 1            |
|           | CITSEER      |          |     |     | 0.0005     | 0.10            |               |         |                  | 1            |
|           | PUBMED       |          |     |     | 0.0005     | 0.00            | 0.01          | 0.5     | 64               | 2            |
|           | COAUTHOR CS  | 0.10     | -   | -   | 0.0005     | 0.00            |               |         |                  | 1            |
|           | AMZ COMP     |          |     |     | 0.0005     | 0.03            |               |         |                  | 1            |
|           | AMZ PHOTO    |          |     |     | 0.0005     | 0.07            |               |         |                  | 2            |
| AdaDIF    | CORA         |          |     | -   | 0.0010     | 0.04            |               |         |                  | 1            |
|           | CITSEER      |          |     | -   | 0.0005     | 0.04            |               |         |                  | 1            |
|           | PUBMED       |          |     | 128 | -          | 0.01            | 0.01          | 0.5     | 64               | 2            |
|           | COAUTHOR CS  | -        | -   | 64  | -          | 0.02            |               |         |                  | 1            |
|           | AMZ COMP     |          |     | 64  | -          | 0.02            |               |         |                  | 1            |
|           | AMZ PHOTO    |          |     | 64  | -          | 0.02            |               |         |                  | 1            |

Table 10: Hyperparameters for JK obtained by grid and random search.

| Diffusion | Dataset name | $\alpha$ | $t$ | $k$ | $\epsilon$ | $\lambda_{L_2}$ | Learning rate | Dropout | Aggregation   | Hidden dimension | Hidden depth |
|-----------|--------------|----------|-----|-----|------------|-----------------|---------------|---------|---------------|------------------|--------------|
| -         | CORA         |          |     |     |            | 0.04            |               |         |               |                  | 3            |
|           | CITSEER      |          |     |     |            | 1.00            |               |         |               |                  | 4            |
|           | PUBMED       |          |     |     |            | 0.05            | 0.01          | 0.5     | Concatenation | 64               | 2            |
|           | COAUTHOR CS  | -        | -   | -   | -          | 0.02            |               |         |               |                  | 2            |
|           | AMZ COMP     |          |     |     |            | 0.03            |               |         |               |                  | 2            |
|           | AMZ PHOTO    |          |     |     |            | 0.03            |               |         |               |                  | 2            |
| Heat      | CORA         |          | 5   | -   | 0.0001     | 0.09            |               |         |               |                  |              |
|           | CITSEER      |          | 4   | -   | 0.0009     | 1.00            |               |         |               |                  |              |
|           | PUBMED       |          | 3   | -   | 0.0001     | 0.09            | 0.01          | 0.5     | Concatenation | 64               | 2            |
|           | COAUTHOR CS  | -        | 1   | 64  | -          | 0.03            |               |         |               |                  |              |
|           | AMZ COMP     |          | 5   | -   | 0.0010     | 0.07            |               |         |               |                  |              |
|           | AMZ PHOTO    |          | 3   | -   | 0.0005     | 0.07            |               |         |               |                  |              |
| PPR       | CORA         | 0.05     |     | 128 |            | 0.10            |               |         |               |                  |              |
|           | CITSEER      | 0.2      |     |     | 0.0009     | 1.00            |               |         |               |                  |              |
|           | PUBMED       | 0.10     |     | 64  |            | 0.02            | 0.01          | 0.5     | Concatenation | 64               | 2            |
|           | COAUTHOR CS  | 0.10     | -   | 64  | -          | 0.03            |               |         |               |                  |              |
|           | AMZ COMP     | 0.10     |     | 64  |            | 0.04            |               |         |               |                  |              |
|           | AMZ PHOTO    | 0.15     |     | 64  |            | 0.03            |               |         |               |                  |              |
| AdaDIF    | CORA         |          |     | 128 |            | 0.05            |               |         |               |                  | 2            |
|           | CITSEER      |          |     | 128 |            | 0.08            |               |         |               |                  | 2            |
|           | PUBMED       |          |     | 128 |            | 0.01            | 0.01          | 0.5     | Concatenation | 64               | 3            |
|           | COAUTHOR CS  | -        | -   | 64  | -          | 0.02            |               |         |               |                  | 2            |
|           | AMZ COMP     |          |     | 64  |            | 0.03            |               |         |               |                  | 2            |
|           | AMZ PHOTO    |          |     | 64  |            | 0.02            |               |         |               |                  | 2            |

Table 11: Hyperparameters for GIN obtained by grid and random search.

| Diffusion | Dataset name | $\alpha$ | $t$ | $k$ | $\epsilon$ | $\lambda_{L_2}$ | Learning rate | Dropout | Aggregation | Hidden dimension | Hidden depth |
|-----------|--------------|----------|-----|-----|------------|-----------------|---------------|---------|-------------|------------------|--------------|
| -         | CORA         |          |     |     |            | 0.09            |               |         |             |                  | 4            |
|           | CITeseer     |          |     |     |            | 0.10            |               |         |             |                  | 4            |
|           | PUBMED       | -        | -   | -   | -          | 0.08            | 0.01          | 0.5     | Sum         | 64               | 4            |
|           | AMZ COMP     |          |     |     |            | 0.01            |               |         |             |                  | 5            |
|           | AMZ PHOTO    |          |     |     |            | 0.01            |               |         |             |                  | 4            |
| Heat      | CORA         |          |     | 3   | 0.0001     | 0.07            |               |         |             |                  | 5            |
|           | CITeseer     |          |     | 8   | 0.0009     | 0.01            |               |         |             |                  | 4            |
|           | PUBMED       | -        | 3   | -   | 0.0010     | 0.02            | 0.01          | 0.5     | Sum         | 64               | 5            |
|           | AMZ COMP     |          | 3   | 64  | -          | 0.00            |               |         |             |                  | 4            |
|           | AMZ PHOTO    |          | 3   | 64  | -          | 0.00            |               |         |             |                  | 4            |
| PPR       | CORA         | 0.05     |     | 128 |            | 0.01            |               |         |             |                  | 4            |
|           | CITeseer     | 0.05     |     |     | 0.0009     | 0.01            |               |         |             |                  | 4            |
|           | PUBMED       | 0.10     | -   | 64  | -          | 0.01            | 0.01          | 0.5     | Sum         | 64               | 5            |
|           | AMZ COMP     | 0.10     |     | 64  |            | 0.04            |               |         |             |                  | 4            |
|           | AMZ PHOTO    | 0.10     |     | 64  |            | 0.04            |               |         |             |                  | 4            |
| AdaDIF    | CORA         |          |     | 128 |            | 0.02            |               |         |             |                  | 3            |
|           | CITeseer     |          |     | 128 |            | 0.05            |               |         |             |                  | 4            |
|           | PUBMED       | -        | -   | 64  | -          | 0.03            | 0.01          | 0.5     | Sum         | 64               | 5            |
|           | AMZ COMP     |          |     | 64  |            | 0.02            |               |         |             |                  | 4            |
|           | AMZ PHOTO    |          |     | 64  |            | 0.02            |               |         |             |                  | 4            |

Table 12: Hyperparameters for ARMA obtained by grid and random search.

| Diffusion | Dataset name | $\alpha$ | $t$ | $k$ | $\epsilon$ | $\lambda_{L_2}$ | Learning rate | Dropout | ARMA layers | ARMA stacks | Hidden dimension | Hidden depth |
|-----------|--------------|----------|-----|-----|------------|-----------------|---------------|---------|-------------|-------------|------------------|--------------|
| -         | CORA         |          |     |     |            | 0.04            |               |         |             | 3           |                  |              |
|           | CITeseer     |          |     |     |            | 0.08            |               |         |             | 3           |                  |              |
|           | PUBMED       |          |     |     |            | 0.00            |               |         |             | 2           |                  |              |
|           | COAUTHOR CS  | -        | -   | -   | -          | 0.02            | 0.01          | 0.5     | 1           | 2           | 16               | 1            |
|           | AMZ COMP     |          |     |     |            | 0.01            |               |         |             | 3           |                  |              |
|           | AMZ PHOTO    |          |     |     |            | 0.01            |               |         |             | 3           |                  |              |
| Heat      | CORA         |          |     | 5   | 64         | -               | 0.08          |         |             | 2           |                  |              |
|           | CITeseer     |          |     | 5   | 64         | -               | 0.08          |         |             | 3           |                  |              |
|           | PUBMED       |          |     | 3   | -          | 0.0001          | 0.00          |         |             | 2           |                  |              |
|           | COAUTHOR CS  | -        | 1   | 64  | -          | 0.01            | 0.01          | 0.5     | 1           | 3           | 16               | 1            |
|           | AMZ COMP     |          | 5   | 64  | -          | 0.04            |               |         |             | 3           |                  |              |
|           | AMZ PHOTO    |          | 3   | 64  | -          | 0.04            |               |         |             | 2           |                  |              |
| PPR       | CORA         | 0.10     |     | 128 |            | 0.05            |               |         |             | 3           | 16               |              |
|           | CITeseer     | 0.15     |     | 128 |            | 0.08            |               |         |             | 3           | 16               |              |
|           | PUBMED       | 0.10     |     | 64  |            | 0.01            |               |         |             | 3           | 16               |              |
|           | COAUTHOR CS  | 0.10     | -   | 64  | -          | 0.01            | 0.01          | 0.5     | 1           | 2           | 16               | 1            |
|           | AMZ COMP     | 0.10     |     | 128 |            | 0.06            |               |         |             | 2           | 32               |              |
|           | AMZ PHOTO    | 0.15     |     | 128 |            | 0.06            |               |         |             | 2           | 32               |              |
| AdaDIF    | CORA         |          |     | 128 |            | 0.05            |               |         |             | 2           |                  |              |
|           | CITeseer     |          |     | 128 |            | 0.09            |               |         |             | 3           |                  |              |
|           | PUBMED       |          |     | 64  |            | 0.01            |               |         |             | 2           |                  |              |
|           | COAUTHOR CS  | -        | -   | 64  | -          | 0.03            | 0.01          | 0.5     | 1           | 2           | 16               | 1            |
|           | AMZ COMP     |          |     | 64  |            | 0.01            |               |         |             | 3           |                  |              |
|           | AMZ PHOTO    |          |     | 64  |            | 0.01            |               |         |             | 2           |                  |              |

Table 13: Hyperparameters for APPNP obtained by grid and random search.

| Dataset name | $\alpha$ | $k$ | $\lambda_{L_2}$ | Learning rate | Dropout | Hidden dimension | Hidden depth |
|--------------|----------|-----|-----------------|---------------|---------|------------------|--------------|
| CORA         | 0.10     |     | 0.09            |               |         |                  |              |
| CITeseer     | 0.10     |     | 1.00            |               |         |                  |              |
| PUBMED       | 0.10     |     | 0.02            |               |         |                  |              |
| COAUTHOR CS  | 0.15     | 10  | 0.01            | 0.01          | 0.5     | 64               | 1            |
| AMZ COMP     | 0.10     |     | 0.06            |               |         |                  |              |
| AMZ PHOTO    | 0.10     |     | 0.05            |               |         |                  |              |

Table 14: Hyperparameters for DCSBM obtained by grid and random search.

| Diffusion | Dataset name | $\alpha$ | $t$ | $k$ | $\epsilon$ | Number of blocks |
|-----------|--------------|----------|-----|-----|------------|------------------|
| -         | CORA         |          |     |     |            | 7                |
|           | CITeseer     |          |     |     |            | 6                |
|           | PUBMED       |          |     |     |            | 3                |
|           | COAUTHOR CS  | -        | -   | -   | -          | 15               |
|           | AMZ COMP     |          |     |     |            | 10               |
|           | AMZ PHOTO    |          |     |     |            | 8                |
| Heat      | CORA         |          | 5   | -   | 0.0010     | 7                |
|           | CITeseer     |          | 1   | 64  | -          | 6                |
|           | PUBMED       |          | 3   | 64  | -          | 3                |
|           | COAUTHOR CS  | -        | 5   | -   | 0.0010     | 15               |
|           | AMZ COMP     |          | 3   | -   | 0.0010     | 10               |
|           | AMZ PHOTO    |          | 3   | -   | 0.0010     | 8                |
| PPR       | CORA         | 0.05     |     | -   | 0.0010     | 7                |
|           | CITeseer     | 0.05     |     | 64  | -          | 6                |
|           | PUBMED       | 0.10     |     | -   | 0.0010     | 3                |
|           | COAUTHOR CS  | 0.05     | -   | 64  | -          | 15               |
|           | AMZ COMP     | 0.05     |     | -   | 0.0010     | 10               |
|           | AMZ PHOTO    | 0.10     |     | 64  | -          | 8                |

Table 15: Hyperparameters for spectral clustering obtained by grid and random search.

| Diffusion | Dataset name | $\alpha$ | $t$ | $k$ | $\epsilon$ | Embedding dimension |
|-----------|--------------|----------|-----|-----|------------|---------------------|
| -         | CORA         |          |     |     |            | 128                 |
|           | CITeseer     |          |     |     |            |                     |
|           | PUBMED       |          |     |     |            |                     |
|           | COAUTHOR CS  | -        | -   | -   | -          |                     |
|           | AMZ COMP     |          |     |     |            |                     |
|           | AMZ PHOTO    |          |     |     |            |                     |
| Heat      | CORA         |          | 5   | -   | 0.0010     | 128                 |
|           | CITeseer     |          | 5   | -   | 0.0010     |                     |
|           | PUBMED       |          | 5   | 64  | -          |                     |
|           | COAUTHOR CS  | -        | 5   | -   | 0.0010     |                     |
|           | AMZ COMP     |          | 1   | 64  | -          |                     |
|           | AMZ PHOTO    |          | 5   | 64  | -          |                     |
| PPR       | CORA         | 0.10     |     | -   | 0.0010     | 128                 |
|           | CITeseer     | 0.05     |     | -   | 0.0010     |                     |
|           | PUBMED       | 0.15     |     | -   | 0.0010     |                     |
|           | COAUTHOR CS  | 0.05     | -   | 64  | -          |                     |
|           | AMZ COMP     | 0.05     |     | 64  | -          |                     |
|           | AMZ PHOTO    | 0.15     |     | 64  | -          |                     |



Table 16: Hyperparameters for DeepWalk obtained by grid and random search.

| Diffusion | Dataset name                                                       | $\alpha$                                     | $t$                        | $k$                         | $\epsilon$                                          | Walks per node | Embedding dimension | Walk length |
|-----------|--------------------------------------------------------------------|----------------------------------------------|----------------------------|-----------------------------|-----------------------------------------------------|----------------|---------------------|-------------|
| -         | CORA<br>CITeseer<br>PUBMED<br>COAUTHOR CS<br>AMZ COMP<br>AMZ PHOTO | -                                            | -                          | -                           | -                                                   | 10             | 128                 | 64          |
| Heat      | CORA<br>CITeseer<br>PUBMED<br>COAUTHOR CS<br>AMZ COMP<br>AMZ PHOTO | -                                            | 5<br>1<br>1<br>5<br>3<br>3 | -<br>64<br>-<br>-<br>-<br>- | 0.0010<br>-<br>0.0010<br>0.0010<br>0.0010<br>0.0010 | 10             | 128                 | 64          |
| PPR       | CORA<br>CITeseer<br>PUBMED<br>COAUTHOR CS<br>AMZ COMP<br>AMZ PHOTO | 0.05<br>0.05<br>0.15<br>0.10<br>0.05<br>0.15 | -                          | -<br>64<br>64<br>-<br>-     | 0.0010<br>-<br>-<br>-<br>0.0010<br>0.0010           | 10             | 128                 | 64          |

Table 17: Hyperparameters for DGI obtained by grid and random search.

| Diffusion | Dataset name                                                       | $\alpha$                                     | $t$                        | $k$                          | $\epsilon$                                               | Learning rate | Encoder | Embedding dimension |
|-----------|--------------------------------------------------------------------|----------------------------------------------|----------------------------|------------------------------|----------------------------------------------------------|---------------|---------|---------------------|
| -         | CORA<br>CITeseer<br>PUBMED<br>COAUTHOR CS<br>AMZ COMP<br>AMZ PHOTO | -                                            | -                          | -                            | -                                                        | 0.001         | GCN     | 128                 |
| Heat      | CORA<br>CITeseer<br>PUBMED<br>COAUTHOR CS<br>AMZ COMP<br>AMZ PHOTO | -                                            | 1<br>5<br>5<br>5<br>1<br>1 | -<br>-<br>64<br>64<br>-<br>- | 0.0001<br>0.0001<br>-<br>-<br>0.0001<br>0.0001           | 0.001         | GCN     | 128                 |
| PPR       | CORA<br>CITeseer<br>PUBMED<br>COAUTHOR CS<br>AMZ COMP<br>AMZ PHOTO | 0.15<br>0.10<br>0.15<br>0.15<br>0.30<br>0.30 | -                          | -                            | 0.0001<br>0.0001<br>0.0010<br>0.0010<br>0.0010<br>0.0010 | 0.001         | GCN     | 128                 |
